# Supplementary material for: Elementary Growth Modes provide a molecular description of cellular self-fabrication
Source: PubMed Central journal article supplement (PMC7004393; doi:10.1371/journal.pcbi.1007559), 2020-01-27
Supplement: pcbi.1007559.s002.pdf [file pcbi.1007559.s002.pdf]

| Variable/<br>parameter         | Description                                                                              | Unit                     |
|--------------------------------|------------------------------------------------------------------------------------------|--------------------------|
| $n$                            | copy number of cellular compounds                                                        | mol                      |
| $c$                            | concentration of cellular compounds                                                      | $\text{mol}L^{-1}$       |
| $x$                            | concentration of metabolites                                                             | $\text{mol}L^{-1}$       |
| $e$                            | concentration of enzymes                                                                 | $\text{mol}L^{-1}$       |
| $r$                            | concentration of ribosome                                                                | $\text{mol}L^{-1}$       |
| $\alpha_j$                     | ribosomal fraction allocated to produce enzyme/ribosome                                  | n.a.                     |
| $N$                            | overall stoichiometric matrix                                                            | n.a.                     |
| $P$                            | metabolic stoichiometric matrix                                                          | n.a.                     |
| $M$                            | metabolite-to-enzyme stoichiometric matrix                                               | n.a.                     |
| $I$                            | identity matrix                                                                          | n.a.                     |
| $\mu$                          | growth rate                                                                              | $s^{-1}$                 |
| $\rho_k$                       | volumetric parameter for metabolic compound $k$                                          | $\text{mol}^{-1}L$       |
| $\sigma_k$                     | volumetric parameter for enzymes and ribosome                                            | $\text{mol}^{-1}L$       |
| $f_j$                          | enzymatic rate law                                                                       | $s^{-1}$                 |
| $g_j$                          | enzyme synthesis rate law                                                                | $s^{-1}$                 |
| $v_j$                          | metabolic rate                                                                           | $\text{mol}L^{-1}s^{-1}$ |
| $w_j$                          | enzyme synthesis rate                                                                    | $\text{mol}L^{-1}s^{-1}$ |
| $a_j$                          | net contribution to growth rate by metabolic reaction $j$                                | $\text{mol}^{-1}L$       |
| $b_j$                          | net contribution to growth rate by enzyme/ribosome synthesis reaction $j$                | $\text{mol}^{-1}L$       |
| $\mathcal{C}_{\mathbf{x},\mu}$ | cone corresponding to metabolite concentration $\mathbf{x}$<br>and growth rate $\mu$     | n.a.                     |
| $\mathcal{P}_{\mathbf{x},\mu}$ | polytope corresponding to metabolite concentration $\mathbf{x}$<br>and growth rate $\mu$ | n.a.                     |
| $\mathbf{u}_j$                 | $j$ -th elementary unit vector                                                           | n.a.                     |

Table 1: Overview of all variables and parameters used in this paper.
